# Supplementary material for: Physapruin A Enhances DNA Damage and Inhibits DNA Repair to Suppress Oral Cancer Cell Proliferation
Source: MDPI journal article supplement (doi:10.3390/ijms23168839), 2022-08-09
Supplement: s1 [file s1]

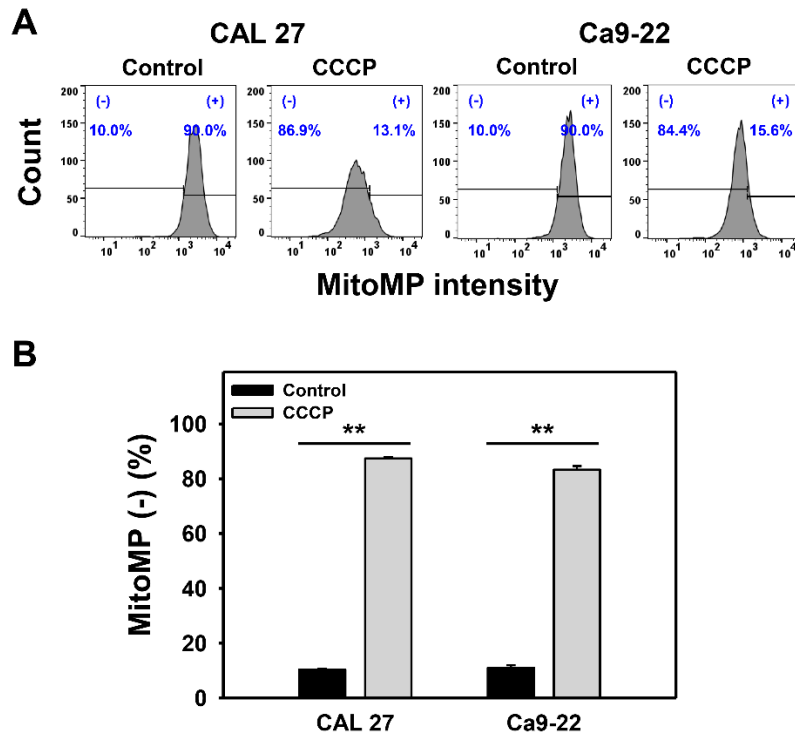

**Supplementary Figure S1.** Positive control for MitoMP depletion in oral cancer cells. (A and B) MitoMP analysis. Cells were exposed to 0 (control) and 50  $\mu$ M carbonyl cyanide m-chlorophenyl hydrazone (CCCP) for 20 min. (-) population was counted for MitoMP (-) (%). Data, means  $\pm$  SDs ( $n = 3$ ). \*\* indicated  $p < 0.001$ .
